# Supplementary material for: Well-mixed plasma and tissue viral populations in RT-SHIV-infected macaques implies a lack of viral replication in the tissues during antiretroviral therapy
Source: PubMed Central journal article supplement (PMC4642622; doi:10.1186/s12977-015-0212-2), 2015-11-11

KEARNEY—Supplemental Figure 02

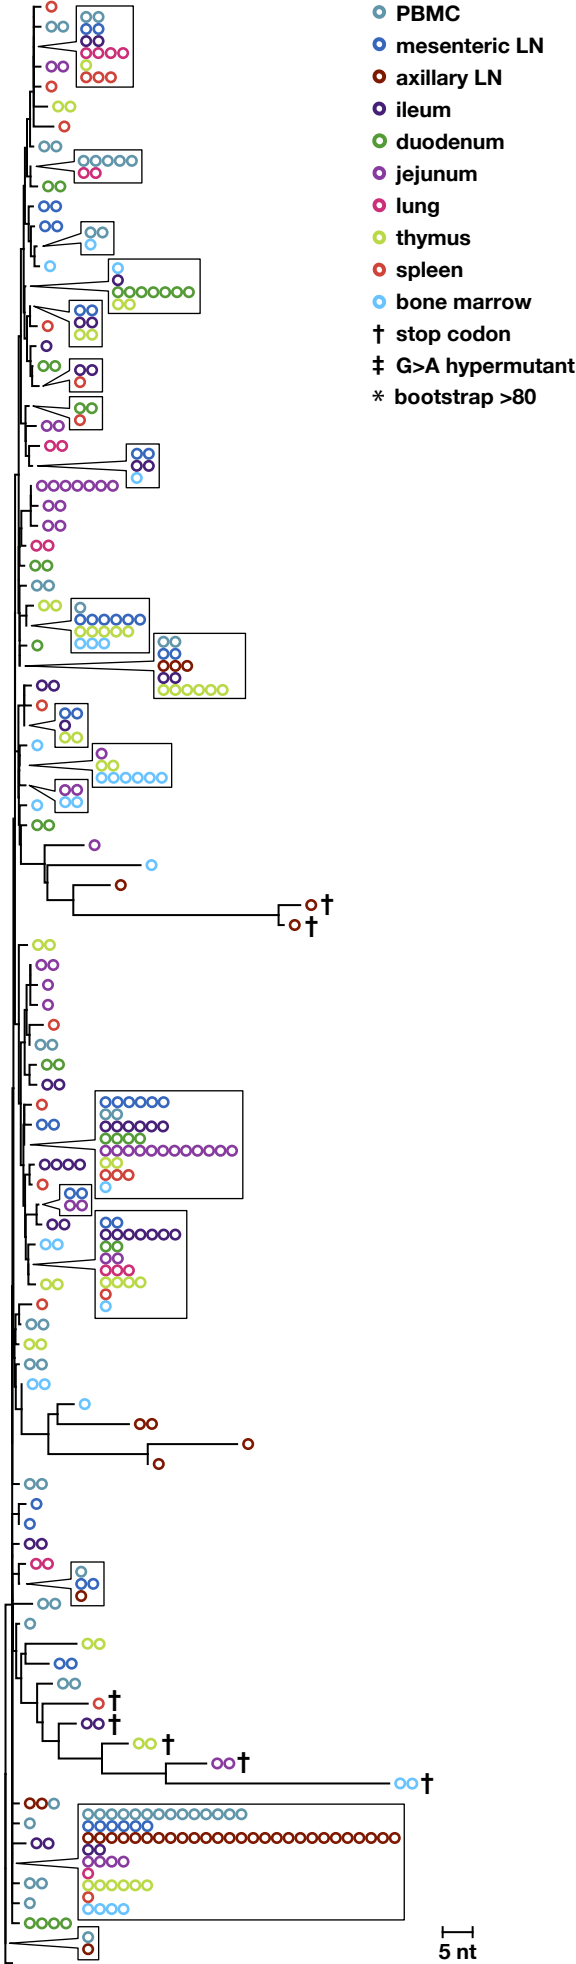

Supplement: 12977_2015_212_MOESM2_ESM.pdf [file 12977_2015_212_MOESM2_ESM.pdf]
